# Supplementary material for: Spatial Differentiation Characteristics and Evaluation of Cu and Cd in Paddy Soil around a Copper Smelter
Source: MDPI journal article supplement (doi:10.3390/toxics11080647), 2023-07-26
Supplement: s1 [file s1]

Table S1. The background value of soil elements and the screening value of soil pollution risk of agricultural land locally.

| Element                                    | Cu    | Cd   | Pb    | Zn    | As    | Hg   |
|--------------------------------------------|-------|------|-------|-------|-------|------|
| SBV (mg·kg <sup>-1</sup> )                 | 20.30 | 0.11 | 32.30 | 69.40 | 14.90 | 0.08 |
| RSV (soil pH < 5.5) (mg·kg <sup>-1</sup> ) | 50    | 0.30 | 250   | 200   | 30    | 0.30 |

Note: SBV represents soil background values; RSV represents risk screening values according to Chinese soil environmental quality standards (GB 15618-2018).

Table S2. The distribution statistics of each form of Cu and Cd.

| PTEs                      | Forms | Minimum | Maximum | Mean  | SD    | CV   |
|---------------------------|-------|---------|---------|-------|-------|------|
| Cu (mg·kg <sup>-1</sup> ) | F1    | 19.39   | 326.72  | 80.79 | 83.53 | 1.03 |
|                           | F2    | 12.06   | 261.74  | 70.45 | 67.56 | 0.96 |
|                           | F3    | 13.80   | 315.13  | 71.01 | 67.73 | 0.95 |
|                           | F4    | 5.96    | 137.64  | 20.61 | 29.77 | 1.44 |
|                           | F5    | 10.70   | 282.82  | 75.96 | 78.45 | 1.03 |
| Cd (mg·kg <sup>-1</sup> ) | F1    | 0.03    | 1.64    | 0.43  | 0.37  | 0.86 |
|                           | F2    | 0.01    | 0.77    | 0.10  | 0.18  | 1.84 |
|                           | F3    | 0.00    | 0.07    | 0.02  | 0.02  | 1.13 |
|                           | F4    | 0.00    | 0.13    | 0.03  | 0.03  | 1.14 |
|                           | F5    | 0.04    | 6.61    | 0.57  | 1.51  | 2.65 |
